# Supplementary material
Source: publisher site journal article supplement (https://www.dovepress.com/get_supplementary_file.php?f=467354.xlsx)
Supplement: Supplementary file 1 [file get_supplementary_file.php]

## Sheet: Single molecular self-assembly
Table S1	Single molecular self-assembly
Number	Molecular	Molecular Structure	CID	SMILES	Non-covalent interactions	Micromorphology	Macroscopic Phase	Reference
1	Ursolic acid		64945	C[C@@H]1CC[C@@]2(CC[C@@]3(C(=CC[C@H]4[C@]3(CC[C@@H]5[C@@]4(CC[C@@H](C5(C)C)O)C)C)[C@@H]2[C@H]1C)C)C(=O)O	Hydrophobic interaction / Hydrogen bonding	Sphere	Nanoparticle	Fan L., Zhang B., Xu A., et al. Carrier-Free, Pure Nanodrug Formed by the Self-Assembly of an Anticancer Drug for Cancer Immune Therapy. Molecular Pharmaceutics, 2018, 15(6): 2466-2478. DOI: 10.1021/acs.molpharmaceut.8b00444.
2	Pomolic acid		382831	C[C@@H]1CC[C@@]2(CC[C@@]3(C(=CC[C@H]4[C@]3(CC[C@@H]5[C@@]4(CC[C@@H](C5(C)C)O)C)C)[C@@H]2[C@]1(C)O)C)C(=O)O	Hydrogen bonding / Hydrophobic interaction / Van der Waals force	Layer	Gel	Hou, Y., Chen, M., Ruan, H., et al. A new supramolecular natural product gel based on self-assembled pomolic acid from traditional Chinese medicine. Colloid and Interface Science Communications, 2022, 46, 100583. DOI: 10.1016/j.colcom.2021.100583
3	Betulin		72326	CC(=C)[C@@H]1CC[C@]2([C@H]1[C@H]3CC[C@@H]4[C@]5(CC[C@@H](C([C@@H]5CC[C@]4([C@@]3(CC2)C)C)(C)C)O)C)CO	Hydrogen bonding	Flowers / Ribbon-like fibrillary network	Gel / Colloidal suspension	Bag B.G., Dash S.S.. Hierarchical Self-Assembly of a Renewable Nanosized Pentacyclic Dihydroxy-triterpenoid Betulin Yielding Flower-Like Architectures. Langmuir. 2015, 31(51): 13664-72. DOI: 10.1021/acs.langmuir.5b03730.	Bag B.G., Dash S.S.. First self-assembly study of betulinic acid, a renewable nano-sized, 6-6-6-6-5 pentacyclic monohydroxy triterpenic acid. Nanoscale. 2011, 3(11): 4564-4566. DOI: 10.1039/c1nr10886g.
4	Gallic acid		370	C1=C(C=C(C(=C1O)O)O)C(=O)O	Hydrogen bonding / π-π interaction	Fibrillary network	Gel	Huang H., Gong W., Wang X., et al. Self-Assembly of Naturally Small Molecules into Supramolecular Fibrillar Networks for Wound Healing. Adv Healthc Mater. 2022, 11(12): e2102476. DOI: 10.1002/adhm.202102476.
5	Rhein		10168	C1=CC2=C(C(=C1)O)C(=O)C3=C(C2=O)C=C(C=C3O)C(=O)O	Hydrogen bonding / π-π interaction	Long fibers	Gel	Zheng J., Fan R., Wu H., et al. Directed self-assembly of herbal small molecules into sustained release hydrogels for treating neural inflammation. Nature Communications, 2019, 10(1): 1-12. DOI: 10.1038/s41467-019-09601-3.
6	Puerarin		5281807	C1=CC(=CC=C1C2=COC3=C(C2=O)C=CC(=C3[C@H]4[C@@H]([C@H]([C@@H]([C@H](O4)CO)O)O)O)O)O	π-π interaction	Fibrillary network	Gel	Pang Z., Wei Y., Wang N., et al. Gel formation of puerarin and mechanistic study during its cooling process. International Journal of Pharmaceutics, 2018, 548(1): 625-635. DOI: 10.1016/j.ijpharm.2018.07.038.
7	Liquidambaric acid		133053361	CC(=C)[C@@H]1CC[C@]2([C@H]1[C@H]3CC[C@@H]4[C@]5(CCC(=O)C([C@@H]5CC[C@]4([C@@]3(CC2)C)C)(C)C)C)C(=O)O	Hydrogen bonding / π-π interaction / Van der Waals force	Fibrillary network	Gel	Zhi K., Wang J., Zhao H., et al. Self-assembled small molecule natural product gel for drug delivery: A breakthrough in new application of small molecule natural products. Acta Pharmaceutica Sinica B, 2019, 10(5): 913-927. DOI: 10.1016/j.apsb.2019.09.009.
8	Lupeol		259846	CC(=C)[C@@H]1CC[C@]2([C@H]1[C@H]3CC[C@@H]4[C@]5(CC[C@@H](C([C@@H]5CC[C@]4([C@@]3(CC2)C)C)(C)C)O)C)C	——	Rod / lamellae / fibrillar network	Gel	Zhi K., Zhao H., Yang X., et al. Natural product gelators and a general method for obtaining them from organisms. Nanoscale. 2018, 10(8): 3639-3643. DOI: 10.1039/c7nr08368h.
9	Arjunolic acid		73641	C[C@@]12CC[C@@H]3[C@@]([C@H]1CC=C4[C@]2(CC[C@@]5([C@H]4CC(CC5)(C)C)C(=O)O)C)(C[C@H]([C@@H]([C@@]3(C)CO)O)O)C	Hydrogen bonding	Sphere / Vesicular	Gel	Bag B.G., Majumdar R.. Vesicular self-assembly of a natural triterpenoid arjunolic acid in aqueous medium: study of entrapment properties and in situ generation of gel–gold nanoparticle hybrid material. RCS advance, 2014, 4(95): 53327-53334. DOI: 10.1039/c4ra08710k	Bag B.G., Majumdar R.. Self-assembly of Renewable Nano-sized Triterpenoids. The Chemical Record, 2017, 17(9): 841-873. DOI: 10.1002/tcr.201600123.
10	Corosolic acid		6918774	C[C@@H]1CC[C@@]2(CC[C@@]3(C(=CC[C@H]4[C@]3(CC[C@@H]5[C@@]4(C[C@H]([C@@H](C5(C)C)O)O)C)C)[C@@H]2[C@H]1C)C)C(=O)O	Hydrogen bonding	Sphere/Vesicular	Gel / Colloidal suspensions	Bag B.G., Garai C., Ghorai S. . Vesicular self-assembly of a natural ursane-type dihydroxy-triterpenoid corosolic acid. RSC Advance, 2019, 9(27): 15190-15195. DOI: 10.1039/c9ra02801c.
11	Glycyrrhetinic acid		10114	C[C@]12CC[C@](C[C@H]1C3=CC(=O)[C@@H]4[C@]5(CC[C@@H](C([C@@H]5CC[C@]4([C@@]3(CC2)C)C)(C)C)O)C)(C)C(=O)O	Hydrogen bonding / Dispersive interactions	Sphere / Flower-like fibrillary network	Gel / Colloidal suspensions	Bag B.G., Majumdar R.. Self-assembly of Renewable Nano-sized Triterpenoids. The Chemical Record, 2017, 17(9): 841-873. DOI: 10.1002/tcr.201600123.
12	Glycyrrhizic acid		14982	C[C@]12CC[C@](C[C@H]1C3=CC(=O)[C@@H]4[C@]5(CC[C@@H](C([C@@H]5CC[C@]4([C@@]3(CC2)C)C)(C)C)O[C@@H]6[C@@H]([C@H]([C@@H]([C@H](O6)C(=O)O)O)O)O[C@H]7[C@@H]([C@H]([C@@H]([C@H](O7)C(=O)O)O)O)O)C)(C)C(=O)O	Hydrophobic interaction /Hydrogen bonding	Cluster	Gel	Zhao X., Zhang H., Gao Y., et al. A Simple Injectable Moldable Hydrogel Assembled from Natural Glycyrrhizic Acid with Inherent Antibacterial Activity. ACS Appl Bio Mater. 2020, 3(1): 648-653. DOI: 10.1021/acsabm.9b01007
13	Gastrodin		115067	C1=CC(=CC=C1CO)O[C@H]2[C@@H]([C@H]([C@@H]([C@H](O2)CO)O)O)O	——	Fibers	Gel	Zhi K., Zhao H., Yang X., et al. Natural product gelators and a general method for obtaining them from organisms. Nanoscale. 2018, 10(8): 3639-3643. DOI: 10.1039/c7nr08368h.
14	Sodium glycyrrhetinate		3676412	C[C@]12CC[C@](C[C@H]1C3=CC(=O)[C@@H]4[C@]5(CC[C@@H](C([C@@H]5CC[C@]4([C@@]3(CC2)C)C)(C)C)O)C)(C)C(=O)[O-].[Na+]	Electrostatic interaction/ Dipole–dipole interaction	——	Gel	Wu J.,Lu J.,Hu J., et al. Self-assembly of sodium glycyrrhetinate into a hydrogel: characterisation and properties. RSC Advance, 2013, 3(47): 24906-24909. DOI: 10.1039/c3ra43306d.
15	Sumaresinolic acid		9982268	C[C@]12CC[C@@H](C(C1[C@@H](C[C@@]3(C2CC=C4[C@]3(CC[C@@]5(C4CC(CC5)(C)C)C(=O)O)C)C)O)(C)C)O	——	Sphere	Nanoparticle	Yang X., Ma C., Chen Z., et al. Single small molecule-assembled nanoparticles mediate efficient oral drug delivery. Nano Res. 2019, 12: 2468–2476. DOI: 10.1007/s12274-019-2470-0.
16	Echinocystic acid		73309	C[C@]12CC[C@@H](C([C@@H]1CC[C@@]3([C@@H]2CC=C4[C@]3(C[C@H]([C@@]5([C@H]4CC(CC5)(C)C)C(=O)O)O)C)C)(C)C)O	——	Irregular morphology	Nanoparticle	Wang J., Zhao H., Qiao W., et al. Nanomedicine-Cum-Carrier by Co-Assembly of Natural Small Products for Synergistic Enhanced Antitumor with Tissues Protective Actions. ACS Appl Mater Interfaces. 2020, 12(38): 42537-42550. DOI: 10.1021/acsami.0c12641.
17	Erythrodiol		101761	C[C@]12CC[C@@H](C([C@@H]1CC[C@@]3([C@@H]2CC=C4[C@]3(CC[C@@]5([C@H]4CC(CC5)(C)C)CO)C)C)(C)C)O	Hydrogen bonding	Fibrillary network	Colloidal suspensions	Panja S.K., Bag B.G.. Flower- and Grass-like Self-Assemblies of an Oleanane-Type Triterpenoid Erythrodiol: Application in the Removal of Toxic Dye from Water. ACS Omega. 2020, 5(47): 30488-30494. DOI: 10.1021/acsomega.0c04291.
18	Dehydrotrametenolic acid		15391340	CC(=CCC[C@H]([C@H]1CC[C@@]2([C@@]1(CC=C3C2=CC[C@@H]4[C@@]3(CC[C@@H](C4(C)C)O)C)C)C)C(=O)O)C	——	Fibrillary network	Gel / Nanoparticle	Zhi K., Zhao H., Yang X., et al. Natural product gelators and a general method for obtaining them from organisms. Nanoscale. 2018, 10(8): 3639-3643. DOI: 10.1039/c7nr08368h.	Yang X., Ma C., Chen Z., et al. Single small molecule-assembled nanoparticles mediate efficient oral drug delivery. Nano Res. 2019, 12: 2468–2476. DOI: 10.1007/s12274-019-2470-0.
19	Dehydrotumulosic acid		15225964	CC(C)C(=C)CC[C@H]([C@H]1[C@@H](C[C@@]2([C@@]1(CC=C3C2=CC[C@@H]4[C@@]3(CC[C@@H](C4(C)C)O)C)C)C)O)C(=O)O	——	Fibrillary network	Gel	Zhi K., Wang J., Zhao H., et al. Self-assembled small molecule natural product gel for drug delivery: A breakthrough in new application of small molecule natural products. Acta Pharmaceutica Sinica B, 2020, 10(5): 913-927. DOI: 10.1016/j.apsb.2019.09.009
20	Poricoic acid A		5471851	CC(C)C(=C)CC[C@H]([C@H]1[C@@H](C[C@@]2([C@@]1(CC=C3C2=CC[C@H]([C@]3(C)CCC(=O)O)C(=C)C)C)C)O)C(=O)O	Hydrogen bonding / π-π interaction	Fibrillary network	Gel	Zhi, K., Sun, Y., Zhao, H., et al. Self-assembled supramolecular material derived from traditional Chinese medicine: Injectable self-assembled natural product gel for drug delivery with biological activity. Materials Today Communications, 2020, 23: 101149. DOI:10.1016/j.mtcomm.2020.101149.
21	Abietic acid		10569	CC(C)C1=CC2=CC[C@@H]3[C@@]([C@H]2CC1)(CCC[C@@]3(C)C(=O)O)C	Hydrogen bonding / Hydrophobic interaction	——	Nanoparticle	Cheng J., Fu S., Qin Z., et al. Self-assembled natural small molecule diterpene acids with favorable anticancer activity and biosafety for synergistically enhanced antitumor chemotherapy. Journal of Materials Chemistry B, 2021, 9: 2674-2687. DOI: 10.1039/d0tb02995e.
22	Dehydroabietic acid		94391	CC(C)C1=CC2=C(C=C1)[C@]3(CCC[C@@]([C@@H]3CC2)(C)C(=O)O)C	π-π interaction / Hydrophobic interaction	Rod	Nanoparticle	Cheng J., Fu S., Qin Z., et al. Self-assembled natural small molecule diterpene acids with favorable anticancer activity and biosafety for synergistically enhanced antitumor chemotherapy. Journal of Materials Chemistry B, 2021, 9: 2674-2687. DOI: 10.1039/d0tb02995e.
23	15-Hydroxy-dehydroabietic acid		14487943	C[C@]12CCC[C@@]([C@@H]1CCC3=C2C=CC(=C3)C(C)(C)O)(C)C(=O)O	π-π interaction / Hydrogen bonding / Hydrophobic interaction	Rod	Nanoparticle	Cheng J., Fu S., Qin Z., et al. Self-assembled natural small molecule diterpene acids with favorable anticancer activity and biosafety for synergistically enhanced antitumor chemotherapy. Journal of Materials Chemistry B, 2021, 9: 2674-2687. DOI: 10.1039/d0tb02995e.
24	12-Hydroxyabietic acid		52325853	CC(C)C1=CC2=CC[C@@H]3[C@@]([C@H]2C[C@@H]1O)(CCC[C@@]3(C)C(=O)O)C	Hydrogen bonding	Sphere	Nanoparticle	Cheng J., Fu S., Qin Z., et al. Self-assembled natural small molecule diterpene acids with favorable anticancer activity and biosafety for synergistically enhanced antitumor chemotherapy. Journal of Materials Chemistry B, 2021, 9: 2674-2687. DOI: 10.1039/d0tb02995e.
25	Oleanolic acid		10494	C[C@]12CC[C@@H](C([C@@H]1CC[C@@]3([C@@H]2CC=C4[C@]3(CC[C@@]5([C@H]4CC(CC5)(C)C)C(=O)O)C)C)(C)C)O	Hydrogen bonding / Dispersive interactions	Vesicular / fiber	Gel / Micelle	Bag B. G., Paul K.. Vesicular and Fibrillar Gels by Self-Assembly of Nanosized Oleanolic Acid. Asian Journal of Organic Chemistry, 2012, 1(2): 150-154. DOI: 10.1002/ajoc.201200032.	Bag B.G., Majumdar R.. Self-assembly of Renewable Nano-sized Triterpenoids. The Chemical Record, 2017, 17(9): 841-873. DOI: 10.1002/tcr.201600123.	Luo Q., Yao L., Li L., et al. Inherent Capability of Self-Assembling Nanostructures in Specific Proteasome Activation for Cancer Cell Pyroptosis. Small, 2022, 19(9): 2205531. DOI: 10.1002/smll.202205531
26	Camptothecin		24360	CC[C@@]1(C2=C(COC1=O)C(=O)N3CC4=CC5=CC=CC=C5N=C4C3=C2)O	Hydrogen bonding / π-π interaction	Helical nano-ribbons	——	Qin Y., Peng Y., Rong L., et al. Self-defensive nano-assemblies from camptothecin-based antitumor drugs, Regenerative Biomaterials. 2015, 2(3): 159-166. DOI: 10.1093/rb/rbv011	Zhou Z., Piao Y., Hao L., et al. Acidity-responsive shell-sheddable camptothecin-based nanofibers for carrier-free cancer drug delivery, Nanoscale, 2019, 11(34): 15907-15916. DOI: 10.1039/c9nr03872h
27	10-Hydroxycamptothecin		97226	CC[C@@]1(C2=C(COC1=O)C(=O)N3CC4=C(C3=C2)N=C5C=CC(=CC5=C4)O)O	Hydrogen bonding / π-π interaction	Flat nano-ribbons	——	Qin S., Peng M., Rong L., et al. Self-defensive nano-assemblies from camptothecin-based antitumor drugs, Regenerative Biomaterials. 2015, 2(3): 159-166. DOI: 10.1093/rb/rbv011
28	Maslinic acid		73659	C[C@@]12CC[C@@H]3[C@@]([C@H]1CC=C4[C@]2(CC[C@@]5([C@H]4CC(CC5)(C)C)C(=O)O)C)(C[C@H]([C@@H](C3(C)C)O)O)C	Hydrogen bonding	Vesicular	Viscous suspension	Bag B.G. Hasan S.K., Ghorai S., et al. First Self-Assembly of Dihydroxy Triterpenoid Maslinic Acid Yielding Vesicles. ACS Omega, 2019, 4(4): 7684–7690. DOI: 10.1021/acsomega.8b03667.
29	Stigmasterol		5280794	CC[C@H](/C=C/[C@@H](C)[C@H]1CC[C@@H]2[C@@]1(CC[C@H]3[C@H]2CC=C4[C@@]3(CC[C@@H](C4)O)C)C)C(C)C	——	Rod	Nanoparticle	Cheng J., Zhao H., Yao L., et al. Simple and Multifunctional Natural Self-Assembled Sterols with Anticancer Activity-Mediated Supramolecular Photosensitizers for Enhanced Antitumor Photodynamic Therapy. ACS Applied Materials & Interfaces, 2019, 11(33): 29498–29511. DOI: 10.1021/acsami.9b07404.
30	Ergosterol		444679	C[C@H](/C=C/[C@H](C)C(C)C)[C@H]1CC[C@@H]2[C@@]1(CC[C@H]3C2=CC=C4[C@@]3(CC[C@@H](C4)O)C)C	——	——	Gel / Nanoparticle	Zhi K., Zhao H., Yang X., et al. Natural product gelators and a general method for obtaining them from organisms. Nanoscale, 2018, 10(8): 3639-3643. DOI: 10.1039/c7nr08368h.
31	Diosgenin		99474	C[C@@H]1CC[C@@]2([C@H]([C@H]3[C@@H](O2)C[C@@H]4[C@@]3(CC[C@H]5[C@H]4CC=C6[C@@]5(CC[C@@H](C6)O)C)C)C)OC1	——	Sphere	Gel	Zhi K., Zhao H., Yang X., et al. Natural product gelators and a general method for obtaining them from organisms. Nanoscale, 2018, 10(8): 3639-3643. DOI: 10.1039/c7nr08368h.
32	Ginsenoside Rg1		441923	CC(=CCC[C@@](C)([C@H]1CC[C@@]2([C@@H]1[C@@H](C[C@H]3[C@]2(C[C@@H]([C@@H]4[C@@]3(CC[C@@H](C4(C)C)O)C)O[C@H]5[C@@H]([C@H]([C@@H]([C@H](O5)CO)O)O)O)C)O)C)O[C@H]6[C@@H]([C@H]([C@@H]([C@H](O6)CO)O)O)O)C	——	——	Micelle / Nanoparticle	Dai X., Shi X., Wang Y., et al. Solubilization of saikosaponin a by ginsenoside Ro biosurfactant in aqueous solution: Mesoscopic simulation. Journal of Colloid and Interface Science, 2012, 384(1): 73-80. DOI: 10.1016/j.jcis.2012.06.018.
33	Ginsenoside Ro		11815492	C[C@]12CC[C@@H](C([C@@H]1CC[C@@]3([C@@H]2CC=C4[C@]3(CC[C@@]5([C@H]4CC(CC5)(C)C)C(=O)O[C@H]6[C@@H]([C@H]([C@@H]([C@H](O6)CO)O)O)O)C)C)(C)C)O[C@H]7[C@@H]([C@H]([C@@H]([C@H](O7)C(=O)O)O)O)O[C@H]8[C@@H]([C@H]([C@@H]([C@H](O8)CO)O)O)O	——	——	Nanoparticle	Dai X., Shi X., Wang Y., et al. Solubilization of saikosaponin a by ginsenoside Ro biosurfactant in aqueous solution: Mesoscopic simulation. Journal of Colloid and Interface Science, 2012, 384(1): 73-80. DOI: 10.1016/j.jcis.2012.06.018.
34	Saikosaponin A		167928	C[C@@H]1[C@@H]([C@@H]([C@H]([C@@H](O1)O[C@H]2CC[C@]3([C@H]([C@]2(C)CO)CC[C@@]4([C@@H]3C=C[C@@]56[C@]4(C[C@@H]([C@@]7([C@H]5CC(CC7)(C)C)CO6)O)C)C)C)O)O[C@H]8[C@@H]([C@H]([C@@H]([C@H](O8)CO)O)O)O)O	——	——	Micelle / Nanoparticle	Dai X., Shi X., Yin Q., et al. Multiscale study on the interaction mechanism between ginsenoside biosurfactant and saikosaponin a. Journal of Colloid and Interface Science, 2013, 396: 165-172. DOI: 10.1016/j.jcis.2013.01.017.
35	Betulinic acid		64971	CC(=C)[C@@H]1CC[C@]2([C@H]1[C@H]3CC[C@@H]4[C@]5(CC[C@@H](C([C@@H]5CC[C@]4([C@@]3(CC2)C)C)(C)C)O)C)C(=O)O	Hydrogen bonding	Rod	Nanoparticle	Li Y., Wang Y., Gao L., et al. Betulinic acid self-assembled nanoparticles for effective treatment of glioblastoma. J Nanobiotechnol, 2022, 20: 39. DOI: 10.1186/s12951-022-01238-7.
36	Honokiol		72303	C=CCC1=CC(=C(C=C1)O)C2=CC(=C(C=C2)O)CC=C	π-π interaction / Hydrogen bonding / Hydrophobic interaction	Sphere	Nanoparticle	Ji H., Wang W., Li X., et al. Natural Small Molecules Enabled Efficient Immunotherapy through Supramolecular Self-Assembly in P53-Mutated Colorectal Cancer. ACS Appl. Mater. Interfaces, 2022, 14(2): 2464–2477. DOI: 10.1021/acsami.1c16737.
37	Dihydroartemisinin		3000518	C[C@@H]1CC[C@H]2[C@H]([C@H](O[C@H]3[C@@]24[C@H]1CC[C@](O3)(OO4)C)O)C	Hydrogen bonding / Hydrophobic interaction	Sphere	Nanoparticle	Li Y., Zhang W., Shi N., et al. Self-assembly and self-delivery of the pure nanodrug dihydroartemisinin for tumor therapy and mechanism analysis. Biomaterials Science, 2023, 11(7): 2478-2485. DOI: 10.1039/d2bm01949c.

## Sheet: Supramolecular self-assembly
Table S2	Supramolecular self-assembly
Number	Molecular A	Molecular Structure	CID	SMILES	Molecular B	Molecular Structure	CID号	SMILES	Non-covalent interactions	Micromorphology	Macroscopic Phase	Reference
1	Berberine		2353	COC1=C(C2=C[N+]3=C(C=C2C=C1)C4=CC5=C(C=C4CC3)OCO5)OC	Rhein		10168	C1=CC2=C(C(=C1)O)C(=O)C3=C(C2=O)C=C(C=C3O)C(=O)O	Hydrogen bonding / π-π interaction / Electrostatic interaction	Sphere	Nanoparticle	Tian X., Wang P., Li T., et al. Self-assembled natural phytochemicals for synergistically antibacterial application from the enlightenment of traditional Chinese medicine combination. Acta Pharmaceutica Sinica B, 2020, 10(9): 1784-1795. DOI: 10.1016/j.apsb.2019.12.014.	Shen R., Chen Y., Li X., et al. Carrier-free Chinese herbal small molecules self-assembly with 3D-porous crystal framework as a synergistic anti-AD agent. International Journal of Pharmaceutics, 2023, 630, 122458. DOI: 10.1016/j.ijpharm.2022.122458.
2	Berberine		2353	COC1=C(C2=C[N+]3=C(C=C2C=C1)C4=CC5=C(C=C4CC3)OCO6)OC	Baicalin		64982	C1=CC=C(C=C1)C2=CC(=O)C3=C(C(=C(C=C3O2)O[C@H]4[C@@H]([C@H]([C@@H]([C@H](O4)C(=O)O)O)O)O)O)O	Electrostatic interaction / Hydrophobic interaction	Sphere	Gel	Li T., Wang P., Guo W., et al. Natural Berberine-Based Chinese Herb Medicine Assembled Nanostructures with Modified Antibacterial Application. ACS Nano, 2019, 13(6): 6770–6781. DOI: 10.1021/acsnano.9b01346.
3	Berberine		2353	COC1=C(C2=C[N+]3=C(C=C2C=C1)C4=CC5=C(C=C4CC3)OCO7)OC	Wogonoside		3084961	COC1=C(C=C(C2=C1OC(=CC2=O)C3=CC=CC=C3)O)O[C@H]4[C@@H]([C@H]([C@@H]([C@H](O4)C(=O)O)O)O)O	Electrostatic interaction / Hydrophobic interaction	Nanofiber bundles	Fibrous precipitation	Li T., Wang P., Guo W., et al. Natural Berberine-Based Chinese Herb Medicine Assembled Nanostructures with Modified Antibacterial Application. ACS Nano, 2019, 13(6): 6770–6781. DOI: 10.1021/acsnano.9b01346.
4	Berberine		2353	COC1=C(C2=C[N+]3=C(C=C2C=C1)C4=CC5=C(C=C4CC3)OCO8)OC	Curcumin		969516	COC1=C(C=CC(=C1)/C=C/C(=O)CC(=O)/C=C/C2=CC(=C(C=C2)O)OC)O	Electrostatic interaction / π-π interaction / Hydrophobic interaction	Sphere	Colloidal solution	Tian Y., Tang G., Gao Y., et al. Carrier-Free Small Molecular Self-Assembly Based on Berberine and Curcumin Incorporated in Submicron Particles for Improving Antimicrobial Activity. ACS Appl. Mater. Interfaces, 2022, 14(8): 10055–10067. DOI: 10.1021/acsami.1c22900.
5	Berberine		2353	COC1=C(C2=C[N+]3=C(C=C2C=C1)C4=CC5=C(C=C4CC3)OCO9)OC	Sennoside A		73111	C1=CC2=C(C(=C1)O[C@H]3[C@@H]([C@H]([C@@H]([C@H](O3)CO)O)O)O)C(=O)C4=C([C@@H]2[C@@H]5C6=C(C(=CC=C6)O[C@H]7[C@@H]([C@H]([C@@H]([C@H](O7)CO)O)O)O)C(=O)C8=C5C=C(C=C8O)C(=O)O)C=C(C=C4O)C(=O)O	Electrostatic interaction / π-π interaction	Cluster	Precipitation	Tian X., Zhang H., Wang S., et al. A new strategy based on acid-alkali complexation for rapidly and accurately fishing phytochemicals in Sennae Folium. Chinese Herbal Medicines, 2020, 12(2): 188-194. DOI: 10.1016/j.chmed.2020.03.005.
6	Berberine		2353	COC1=C(C2=C[N+]3=C(C=C2C=C1)C4=CC5=C(C=C4CC3)OCO10)OC	Cinnamic acid		444539	C1=CC=C(C=C1)/C=C/C(=O)O	Hydrogen bonding / π-π interaction	Sphere	Nanoparticle	Huang X., Wang P., Li T., et al. Self-Assemblies Based on Traditional Medicine Berberine and Cinnamic Acid for Adhesion-Induced Inhibition Multidrug-Resistant Staphylococcus aureus, ACS Appl. Mater. Interfaces 2020, 12(1): 227–237. DOI: 10.1021/acsami.9b17722.
7	Berberine		2353	COC1=C(C2=C[N+]3=C(C=C2C=C1)C4=CC5=C(C=C4CC3)OCO11)OC	Aristolochic acid		2236	COC1=CC=CC2=C3C(=C(C=C21)[N+](=O)[O-])C(=CC4=C3OCO4)C(=O)O	Electrostatic interaction / π-π interaction / Hydrophobic interaction	Cross-linked network	Fibrous precipitation	Wang P., Guo W., Huang G., et al. Berberine-Based Heterogeneous Linear Supramolecules Neutralized the Acute Nephrotoxicity of Aristolochic Acid by the Self-Assembly Strategy. ACS Appl. Mater. Interfaces 2021, 13(28): 32729–32742. DOI: 10.1021/acsami.1c06968.
8	Berberine		2353	COC1=C(C2=C[N+]3=C(C=C2C=C1)C4=CC5=C(C=C4CC3)OCO11)OC	Rhamnolipid		5458394	CCCCCCCC(CC(=O)O)OC(=O)CC(CCCCCCC)O[C@H]1[C@@H]([C@@H]([C@H]([C@@H](O1)C)O)O)O[C@H]2[C@@H]([C@@H]([C@H]([C@@H](O2)C)O)O)O	Electrostatic interaction / Hydrophobic interaction	Sphere	Nanoparticle	Shen Y., Zou Y., Chen X., et al. Antibacterial self-assembled nanodrugs composed of berberine derivatives and rhamnolipids against Helicobacter pylori. Journal of Controlled Release, 2020, 328: 575-586. DOI: 10.1016/j.jconrel.2020.09.025.
9	Tanshinone IIA		164676	CC1=COC2=C1C(=O)C(=O)C3=C2C=CC4=C3CCCC4(C)C	Glycyrrhizic acid		14982	C[C@]12CC[C@](C[C@H]1C3=CC(=O)[C@@H]4[C@]5(CC[C@@H](C([C@@H]5CC[C@]4([C@@]3(CC2)C)C)(C)C)O[C@@H]6[C@@H]([C@H]([C@@H]([C@H](O6)C(=O)O)O)O)O[C@H]7[C@@H]([C@H]([C@@H]([C@H](O7)C(=O)O)O)O)O)C)(C)C(=O)O	Hydrogen bonding / Hydrophobic interaction	Sphere	Micelle	Cui J., Wang X., Li J., et al. Immune Exosomes Loading Self-Assembled Nanomicelles Traverse the Blood–Brain Barrier for Chemo-immunotherapy against Glioblastoma. ACS Nano 2023, 17(2): 1464–1484. DOI: 10.1021/acsnano.2c10219.
10	Paclitaxel		36314	CC1=C2[C@H](C(=O)[C@@]3([C@H](C[C@@H]4[C@]([C@H]3[C@@H]([C@@](C2(C)C)(C[C@@H]1OC(=O)[C@@H]([C@H](C5=CC=CC=C5)NC(=O)C6=CC=CC=C6)O)O)OC(=O)C7=CC=CC=C7)(CO4)OC(=O)C)O)C)OC(=O)C	Indomethacin		3715	CC1=C(C2=C(N1C(=O)C3=CC=C(C=C3)Cl)C=CC(=C2)OC)CC(=O)O	Hydrogen bonding / π-π interaction	Sphere	——	Zhang C., Long L., Xiong Y., et al. Facile Engineering of Indomethacin-Induced Paclitaxel Nanocrystal Aggregates as Carrier-Free Nanomedicine with Improved Synergetic Antitumor Activity. ACS Appl. Mater. Interfaces, 2019, 11(10): 9872–9883. DOI: 10.1021/acsami.8b22336.
11	Cabazitaxel		9854073	CC1=C2[C@H](C(=O)[C@@]3([C@H](C[C@@H]4[C@]([C@H]3[C@@H]([C@@](C2(C)C)(C[C@@H]1OC(=O)[C@@H]([C@H](C5=CC=CC=C5)NC(=O)OC(C)(C)C)O)O)OC(=O)C6=CC=CC=C6)(CO4)OC(=O)C)OC)C)OC	Dasatinib		3062316	CC1=C(C(=CC=C1)Cl)NC(=O)C2=CN=C(S2)NC3=CC(=NC(=N3)C)N4CCN(CC4)CCO	Hydrogen bonding / π-π interaction / Van der Waals force	Sphere	——	Chen X., Xie B., Huang L., et al.Quantitative self-assembly of pure drug cocktails as injectable nanomedicines for synergistic drug delivery and cancer therapy. Theranostics. 2021, 11(12): 5713-5727. DOI: 10.7150/thno.55250.
12	10-Hydroxycamptothecin		97226	CC[C@@]1(C2=C(COC1=O)C(=O)N3CC4=C(C3=C2)N=C5C=CC(=CC5=C4)O)O	Doxorubicin		31703	C[C@H]1[C@H]([C@H](C[C@@H](O1)O[C@H]2C[C@@](CC3=C2C(=C4C(=C3O)C(=O)C5=C(C4=O)C(=CC=C5)OC)O)(C(=O)CO)O)N)O	π-π interaction / Hydrophobic interaction	Sphere	Nanoparticle	Zhao Y., Chen F., Pan Y., et al. Nanodrug Formed by Coassembly of Dual Anticancer Drugs to Inhibit Cancer Cell Drug Resistance. ACS Appl. Mater. Interfaces, 2015, 7(34): 19295–19305. DOI: 10.1021/acsami.5b05347.
13	Oleanolic acid		10494	C[C@]12CC[C@@H](C([C@@H]1CC[C@@]3([C@@H]2CC=C4[C@]3(CC[C@@]5([C@H]4CC(CC5)(C)C)C(=O)O)C)C)(C)C)O	Paclitaxel		36314	CC1=C2[C@H](C(=O)[C@@]3([C@H](C[C@@H]4[C@]([C@H]3[C@@H]([C@@](C2(C)C)(C[C@@H]1OC(=O)[C@@H]([C@H](C5=CC=CC=C5)NC(=O)C6=CC=CC=C6)O)O)OC(=O)C7=CC=CC=C7)(CO4)OC(=O)C)O)C)OC(=O)C	Hydrogen bonding / Hydrophobic interaction	Sphere	Nanoparticle	WangJ., Zhao H., Qiao W., et al. Nanomedicine-Cum-Carrier by Co-Assembly of Natural Small Products for Synergistic Enhanced Antitumor with Tissues Protective Actions. ACS Appl. Mater. Interfaces, 2020, 12(38): 42537–42550. DOI: 10.1021/acsami.0c12641.	Wang J., Zhao H., Zhi K., et al. Exploration of the Natural Active Small-Molecule Drug-Loading Process and Highly Efficient Synergistic Antitumor Efficacy. ACS Appl. Mater. Interfaces, 2020, 12(6): 6827–6839. DOI: 10.1021/acsami.9b18443.
14	Oleanolic acid		10494	C[C@]12CC[C@@H](C([C@@H]1CC[C@@]3([C@@H]2CC=C4[C@]3(CC[C@@]5([C@H]4CC(CC5)(C)C)C(=O)O)C)C)(C)C)O	Glycyrrhetinic acid		10114	C[C@]12CC[C@](C[C@H]1C3=CC(=O)[C@@H]4[C@]5(CC[C@@H](C([C@@H]5CC[C@]4([C@@]3(CC2)C)C)(C)C)O)C)(C)C(=O)O	Hydrogen bonding / Hydrophobic interaction	Sphere	Nanoparticle	WangJ., Zhao H., Qiao W., et al. Nanomedicine-Cum-Carrier by Co-Assembly of Natural Small Products for Synergistic Enhanced Antitumor with Tissues Protective Actions. ACS Appl. Mater. Interfaces, 2020, 12(38): 42537–42550. DOI: 10.1021/acsami.0c12641.
15	Ursolic acid		64945	C[C@@H]1CC[C@@]2(CC[C@@]3(C(=CC[C@H]4[C@]3(CC[C@@H]5[C@@]4(CC[C@@H](C5(C)C)O)C)C)[C@@H]2[C@H]1C)C)C(=O)O	Paclitaxel		36314	CC1=C2[C@H](C(=O)[C@@]3([C@H](C[C@@H]4[C@]([C@H]3[C@@H]([C@@](C2(C)C)(C[C@@H]1OC(=O)[C@@H]([C@H](C5=CC=CC=C5)NC(=O)C6=CC=CC=C6)O)O)OC(=O)C7=CC=CC=C7)(CO4)OC(=O)C)O)C)OC(=O)C	Hydrogen bonding / Hydrophobic interaction	Vesicular	Nanoparticle	Wang J., Zhao H., Zhi K., et al. Exploration of the Natural Active Small-Molecule Drug-Loading Process and Highly Efficient Synergistic Antitumor Efficacy. ACS Appl. Mater. Interfaces, 2020, 12(6): 6827–6839. DOI: 10.1021/acsami.9b18443.
16	Betulinic acid		64971	CC(=C)[C@@H]1CC[C@]2([C@H]1[C@H]3CC[C@@H]4[C@]5(CC[C@@H](C([C@@H]5CC[C@]4([C@@]3(CC2)C)C)(C)C)O)C)C(=O)O	Paclitaxel		36314	CC1=C2[C@H](C(=O)[C@@]3([C@H](C[C@@H]4[C@]([C@H]3[C@@H]([C@@](C2(C)C)(C[C@@H]1OC(=O)[C@@H]([C@H](C5=CC=CC=C5)NC(=O)C6=CC=CC=C6)O)O)OC(=O)C7=CC=CC=C7)(CO4)OC(=O)C)O)C)OC(=O)C	Hydrogen bonding / Hydrophobic interaction	Fiber / Sphere	Nanoparticle	Wang J., Qiao W., Zhao H., et al. Paclitaxel and betulonic acid synergistically enhance antitumor efficacy by forming co-assembled nanoparticles. Biochemical Pharmacology, 2020, 182, 114232. DOI: 10.1016/j.bcp.2020.114232.
17	Ergosterol		444679	C[C@H](/C=C/[C@H](C)C(C)C)[C@H]1CC[C@@H]2[C@@]1(CC[C@H]3C2=CC=C4[C@@]3(CC[C@@H](C4)O)C)C	Chlorin e6		5479494	CCC1=C(C2=CC3=C(C(=C(N3)C=C4[C@H]([C@@H](C(=N4)C(=C5C(=C(C(=N5)C=C1N2)C)C(=O)O)CC(=O)O)CCC(=O)O)C)C)C=C)C	Hydrogen bonding / π-π interaction / Hydrophobic interaction	Sphere	Nanoparticle	Cheng J., Zhao H., Yao L., et al. Simple and Multifunctional Natural Self-Assembled Sterols with Anticancer Activity-Mediated Supramolecular Photosensitizers for Enhanced Antitumor Photodynamic Therapy. ACS Appl. Mater. Interfaces, 2019, 11(33): 29498–29511. DOI: 10.1021/acsami.9b07404.
18	Celastrol		122724	CC1=C(C(=O)C=C2C1=CC=C3[C@]2(CC[C@@]4([C@@]3(CC[C@@]5([C@H]4C[C@](CC5)(C)C(=O)O)C)C)C)C)O	Doxorubicin		31703	C[C@H]1[C@H]([C@H](C[C@@H](O1)O[C@H]2C[C@@](CC3=C2C(=C4C(=C3O)C(=O)C5=C(C4=O)C(=CC=C5)OC)O)(C(=O)CO)O)N)O	Hydrophobic interaction / Electrostatic interaction / π-π interaction	Sphere	Nanoparticle	Xiao Y., Liu J., Guo M.,et al. Synergistic combination chemotherapy using carrier-free celastrol and doxorubicin nanocrystals for overcoming drug resistance. Nanoscale, 2018, 10, 12639-12649. DOI: 10.1039/c8nr02700e.
19	Ginsenoside Ro		11815492	C[C@]12CC[C@@H](C([C@@H]1CC[C@@]3([C@@H]2CC=C4[C@]3(CC[C@@]5([C@H]4CC(CC5)(C)C)C(=O)O[C@H]6[C@@H]([C@H]([C@@H]([C@H](O6)CO)O)O)O)C)C)(C)C)O[C@H]7[C@@H]([C@H]([C@@H]([C@H](O7)C(=O)O)O)O)O[C@H]8[C@@H]([C@H]([C@@H]([C@H](O8)CO)O)O)O	Saikosaponin A		167928	C[C@@H]1[C@@H]([C@@H]([C@H]([C@@H](O1)O[C@H]2CC[C@]3([C@H]([C@]2(C)CO)CC[C@@]4([C@@H]3C=C[C@@]56[C@]4(C[C@@H]([C@@]7([C@H]5CC(CC7)(C)C)CO6)O)C)C)C)O)O[C@H]8[C@@H]([C@H]([C@@H]([C@H](O8)CO)O)O)O)O	——	Vesicular	——	Dai X., Shi X., Wang Y., et al. Solubilization of saikosaponin a by ginsenoside Ro biosurfactant in aqueous solution: Mesoscopic simulation. Journal of Colloid and Interface Science, 2012, 384(1): 73-80. DOI: 10.1016/j.jcis.2012.06.018.
20	Glycyrrhizic acid		14982	C[C@]12CC[C@](C[C@H]1C3=CC(=O)[C@@H]4[C@]5(CC[C@@H](C([C@@H]5CC[C@]4([C@@]3(CC2)C)C)(C)C)O[C@@H]6[C@@H]([C@H]([C@@H]([C@H](O6)C(=O)O)O)O)O[C@H]7[C@@H]([C@H]([C@@H]([C@H](O7)C(=O)O)O)O)O)C)(C)C(=O)O	Paclitaxel		36314	CC1=C2[C@H](C(=O)[C@@]3([C@H](C[C@@H]4[C@]([C@H]3[C@@H]([C@@](C2(C)C)(C[C@@H]1OC(=O)[C@@H]([C@H](C5=CC=CC=C5)NC(=O)C6=CC=CC=C6)O)O)OC(=O)C7=CC=CC=C7)(CO4)OC(=O)C)O)C)OC(=O)C	——	——	——	Hussain M.. Molecular Dynamics Simulations of Glycyrrhizic Acid Aggregates as Drug-Carriers for Paclitaxel. Curr Drug Deliv. 2019, 16(7): 618-627. DOI: 10.2174/1567201816666190313155117.
21	Glycyrrhizic acid		14982	C[C@]12CC[C@](C[C@H]1C3=CC(=O)[C@@H]4[C@]5(CC[C@@H](C([C@@H]5CC[C@]4([C@@]3(CC2)C)C)(C)C)O[C@@H]6[C@@H]([C@H]([C@@H]([C@H](O6)C(=O)O)O)O)O[C@H]7[C@@H]([C@H]([C@@H]([C@H](O7)C(=O)O)O)O)O)C)(C)C(=O)O	Baicalein		5281605	C1=CC=C(C=C1)C2=CC(=O)C3=C(O2)C=C(C(=C3O)O)O	Hydrogen bonding	——	Micelle	You G., Feng T., Zhang G., et al.Preparation, optimization, characterization and in vitro release of baicalein-solubilizing glycyrrhizic acid nano-micelles. International Journal of Pharmaceutics, 2021, 601, 120546. DOI: 10.1016/j.ijpharm.2021.120546.
22	Ursolic acid		64945	C[C@@H]1CC[C@@]2(CC[C@@]3(C(=CC[C@H]4[C@]3(CC[C@@H]5[C@@]4(CC[C@@H](C5(C)C)O)C)C)[C@@H]2[C@H]1C)C)C(=O)O	Aspirin		2244	CC(=O)OC1=CC=CC=C1C(=O)O	Hydrogen bonding / Hydrophobic interaction	Sphere	Nanoparticle	Li C., Lin J., Wu P., et al. Small Molecule Nanodrug Assembled of Dual-Anticancer Drug Conjugate for Synergetic Cancer Metastasis Therapy. Bioconjugate Chem. 2018, 29(10): 3495–3502. DOI: 10.1021/acs.bioconjchem.8b00657.
23	Ursolic acid		64945	C[C@@H]1CC[C@@]2(CC[C@@]3(C(=CC[C@H]4[C@]3(CC[C@@H]5[C@@]4(CC[C@@H](C5(C)C)O)C)C)[C@@H]2[C@H]1C)C)C(=O)O	Doxorubicin		31703	C[C@H]1[C@H]([C@H](C[C@@H](O1)O[C@H]2C[C@@](CC3=C2C(=C4C(=C3O)C(=O)C5=C(C4=O)C(=CC=C5)OC)O)(C(=O)CO)O)N)O	Hydrophobic interaction / Electrostatic interaction / π-π interaction	Sphere	Nanoparticle	Jiang K., Han L., Guo Y., et al. A carrier-free dual-drug nanodelivery system functionalized with aptamer specific targeting HER2-overexpressing cancer cells. J. Mater. Chem. B, 2017,5, 9121-9129. DOI: 10.1039/c7tb02562a.
24	Doxorubicin		31703	C[C@H]1[C@H]([C@H](C[C@@H](O1)O[C@H]2C[C@@](CC3=C2C(=C4C(=C3O)C(=O)C5=C(C4=O)C(=CC=C5)OC)O)(C(=O)CO)O)N)O	Rhein		10168	C1=CC2=C(C(=C1)O)C(=O)C3=C(C2=O)C=C(C=C3O)C(=O)O	Hydrogen bonding / π-π interaction / Hydrophobic interaction	Rod	Nanoparticle	Wang R., Yang Y., Yang M., et al. Synergistic inhibition of metastatic breast cancer by dual-chemotherapy with excipient-free rhein/DOX nanodispersions. J Nanobiotechnol, 2020, 18, 116. DOI: 10.1186/s12951-020-00679-2.
25	Irinotecan		60838	CCC1=C2CN3C(=CC4=C(C3=O)COC(=O)[C@@]4(CC)O)C2=NC5=C1C=C(C=C5)OC(=O)N6CCC(CC6)N7CCCCC7	Curcumin		969516	COC1=C(C=CC(=C1)/C=C/C(=O)CC(=O)/C=C/C2=CC(=C(C=C2)O)OC)O	Electrostatic interaction	Sphere	Nanoparticle	Xiao H., Guo Y., Liu H., et al. Structure-based design of charge-conversional drug self-delivery systems for better targeted cancer therapy. Biomaterials, 2020, 232, 119701. DOI: 10.1016/j.biomaterials.2019.119701.
26	Baicalin		64982	C1=CC=C(C=C1)C2=CC(=O)C3=C(C(=C(C=C3O2)O[C@H]4[C@@H]([C@H]([C@@H]([C@H](O4)C(=O)O)O)O)O)O)O	Sanguinarine		5154	C[N+]1=C2C(=C3C=CC4=C(C3=C1)OCO4)C=CC5=CC6=C(C=C52)OCO6	π-π interaction / Electrostatic interaction / Hydrogen bonding	Fibrillary network	Gel	Wang Z., Lu J., Yuan Z., et al. Natural Carrier-Free Binary Small Molecule Self-Assembled Hydrogel Synergize Antibacterial Effects and Promote Wound Healing by Inhibiting Virulence Factors and Alleviating the Inflammatory Response. Small, 2023, 19(5): 2205528. DOI: 10.1002/smll.202205528.
27	Curcumin		969516	COC1=C(C=CC(=C1)/C=C/C(=O)CC(=O)/C=C/C2=CC(=C(C=C2)O)OC)O	Icariin		5318997	C[C@H]1[C@@H]([C@H]([C@H]([C@@H](O1)OC2=C(OC3=C(C2=O)C(=CC(=C3CC=C(C)C)O[C@H]4[C@@H]([C@H]([C@@H]([C@H](O4)CO)O)O)O)O)C5=CC=C(C=C5)OC)O)O)O	π-π interaction / Electrostatic interaction	Sphere	Nanoparticle	Dai W., Jin P., Li X., et al.A carrier-free nano-drug assembled via π–π stacking interaction for the treatment of osteoarthritis. Biomedicine & Pharmacotherapy, 2023, 164, 114881. DOI: 10.1016/j.biopha.2023.114881.
28	Gallic acid		370	C1=C(C=C(C(=C1O)O)O)C(=O)O	Resveratrol		445154	C1=CC(=CC=C1/C=C/C2=CC(=CC(=C2)O)O)O	Hydrogen bonding / π-π interaction	Fibrillary network	Gel	Wang X., Huang H., Gong W., et al. Resveratrol Triggered the Quick Self-Assembly of Gallic Acid into Therapeutic Hydrogels for Healing of Bacterially Infected Wounds, Biomacromolecules, 2022, 23(4): 1680–1692. DOI: 10.1021/acs.biomac.1c01616.
29	Glycyrrhetinic acid		10114	C[C@]12CC[C@](C[C@H]1C3=CC(=O)[C@@H]4[C@]5(CC[C@@H](C([C@@H]5CC[C@]4([C@@]3(CC2)C)C)(C)C)O)C)(C)C(=O)O	Betulin		72326	CC(=C)[C@@H]1CC[C@]2([C@H]1[C@H]3CC[C@@H]4[C@]5(CC[C@@H](C([C@@H]5CC[C@]4([C@@]3(CC2)C)C)(C)C)O)C)CO	Hydrogen bonding / Hydrophobic interaction	Sphere	Nanoparticle	Wang J., Zhao H., Qiao W., et al.Nanomedicine-Cum-Carrier by Co-Assembly of Natural Small Products for Synergistic Enhanced Antitumor with Tissues Protective Actions. ACS Appl. Mater. Interfaces, 2020, 12(38): 42537–42550. DOI: 10.1021/acsami.0c12641.

## Sheet: Molecular descriptors
Table S3	Molecular descriptors
Number	Molecular	CID	SMILES	Skeleton	MaxEStateIndex	MinEStateIndex	MaxAbsEStateIndex	MinAbsEStateIndex	qed	MolWt	HeavyAtomMolWt	ExactMolWt	NumValenceElectrons	NumRadicalElectrons	MaxPartialCharge	MinPartialCharge	MaxAbsPartialCharge	MinAbsPartialCharge	FpDensityMorgan1	FpDensityMorgan2	FpDensityMorgan3	BalabanJ	BertzCT	Chi0	Chi0n	Chi0v	Chi1	Chi1n	Chi1v	Chi2n	Chi2v	Chi3n	Chi3v	Chi4n	Chi4v	HallKierAlpha	Ipc	Kappa1	Kappa2	Kappa3	LabuteASA	PEOE_VSA1	PEOE_VSA10	PEOE_VSA11	PEOE_VSA12	PEOE_VSA13	PEOE_VSA14	PEOE_VSA2	PEOE_VSA3
1	Gallic acid	370	C1=C(C=C(C(=C1O)O)O)C(=O)O	c1ccccc1	10.3128	-1.29111	10.3128	0.289074	0.459888	170.12	164.072	170.022	64	0	0.335462	-0.504144	0.504144	0.335462	1.08333	1.5	1.83333	3.30654	307.564	9.30096	5.8518	5.8518	5.51974	3.00325	3.00325	2.16826	2.16826	1.31663	1.31663	0.727664	0.727664	-1.91	405.292	8.18911	2.61266	1.24269	67.1348	20.4261	0	17.2485	0	0	5.96931	0	4.79454
2	Aristolochic acid	2236	COC1=CC=CC2=C3C(=C(C=C21)[N+](=O)[O-])C(=CC4=C3OCO4)C(=O)O	c1ccc2c(c1)ccc1ccc3c(c12)OCO3	11.7051	-1.28366	11.7051	0.00231765	0.441956	341.275	330.187	341.054	126	0	0.336224	-0.496109	0.496109	0.336224	1.24	2.04	2.72	2.33536	1073.95	17.7148	12.9378	12.9378	12.0241	7.26317	7.26317	5.42126	5.42126	4.18299	4.18299	3.17607	3.17607	-3.55	739058	15.0057	5.23287	2.03759	139.833	19.3171	5.74951	11.499	6.79294	5.68739	5.96931	10.1143	4.79454
3	Aspirin	2244	CC(=O)OC1=CC=CC=C1C(=O)O	c1ccccc1	10.6119	-1.11403	10.6119	0.0160185	0.550122	180.159	172.095	180.042	68	0	0.339004	-0.47754	0.47754	0.339004	1.30769	1.92308	2.46154	3.04353	343.223	9.84493	6.98136	6.98136	6.10906	3.61745	3.61745	2.39496	2.39496	1.37115	1.37115	0.887171	0.887171	-1.84	729.681	9.24961	3.70925	2.29742	74.7571	9.84339	11.313	0	0	0	11.9386	4.79454	4.79454
4	Berberine	2353	COC1=C(C2=C[N+]3=C(C=C2C=C1)C4=CC5=C(C=C4CC3)OCO5)OC	c1ccc2c[n+]3c(cc2c1)-c1cc2c(cc1CC3)OCO2	5.59563	0.298552	5.59563	0.298552	0.674491	336.367	318.223	336.123	126	0	0.230801	-0.492841	0.492841	0.230801	1	1.84	2.64	1.75241	1012.48	16.9659	14.1656	14.1656	12.2795	8.29334	8.29334	6.26866	6.26866	5.00073	5.00073	3.76837	3.76837	-2.95	1.27972e+06	14.3978	5.27565	2.04961	144.867	18.9475	0	35.7396	12.4869	0	0	0	0
5	Indomethacin	3715	CC1=C(C2=C(N1C(=O)C3=CC=C(C=C3)Cl)C=CC(=C2)OC)CC(=O)O	O=C(c1ccccc1)n1ccc2ccccc21	12.9872	-0.954711	12.9872	0.170239	0.767807	357.793	341.665	357.077	128	0	0.307408	-0.496743	0.496743	0.307408	1.16	1.84	2.44	2.23237	973.248	18.1375	13.7457	14.5016	11.9179	7.62054	7.9985	5.66501	6.10145	4.16415	4.41613	2.947	3.07299	-2.79	468921	17.0467	6.60718	3.10467	148.948	9.84339	5.74951	0	0	5.90718	5.96931	14.1562	0
6	Sanguinarine	5154	C[N+]1=C2C(=C3C=CC4=C(C3=C1)OCO4)C=CC5=CC6=C(C=C52)OCO6	c1cc2c(c[nH+]c3c4cc5c(cc4ccc23)OCO5)c2c1OCO2	5.69154	0.275193	5.69154	0.275193	0.36537	332.335	318.223	332.092	122	0	0.230841	-0.453572	0.453572	0.230841	0.72	1.48	2.4	1.7933	1215.39	16.5432	13.5359	13.5359	12.2928	8.16496	8.16496	6.38892	6.38892	5.02782	5.02782	3.9103	3.9103	-3.21	1.82422e+06	13.1226	4.44694	1.64545	142.443	18.9475	7.04767	29.1949	19.1026	0	0	0	0
7	Glycyrrhetinic acid	10114	C[C@]12CC[C@](C[C@H]1C3=CC(=O)[C@@H]4[C@]5(CC[C@@H](C([C@@H]5CC[C@]4([C@@]3(CC2)C)C)(C)C)O)C)(C)C(=O)O	O=C1C=C2C(CCC3CCCC[C@@H]23)C2CC[C@H]3CCCCC3[C@@H]12	14.2024	-0.711072	14.2024	0.0295564	0.464074	470.694	424.326	470.34	190	0	0.308868	-0.480829	0.480829	0.308868	0.911765	1.55882	2.20588	1.62202	964.852	25.1125	22.4616	22.4616	15.5516	13.7264	13.7264	14.9341	14.9341	13.07	13.07	10.3627	10.3627	-1.16	2.03456e+07	24.5307	6.9859	2.81091	205.515	10.2131	0	5.78324	0	0	5.96931	9.58907	0
8	Rhein	10168	C1=CC2=C(C(=C1)O)C(=O)C3=C(C2=O)C=C(C=C3O)C(=O)O	O=C1c2ccccc2C(=O)c2ccccc21	12.3654	-1.32402	12.3654	0.0190382	0.625	284.223	276.159	284.032	104	0	0.335343	-0.507159	0.507159	0.335343	0.857143	1.52381	2.19048	2.35525	834.298	15.309	10.4531	10.4531	9.91359	5.93191	5.93191	4.58103	4.58103	3.35033	3.35033	2.40603	2.40603	-3.15	55500.7	12.8623	4.17292	1.69291	117.445	15.3196	11.499	5.78324	5.78324	0	5.96931	9.58907	4.79454
9	Oleanolic acid	10494	C[C@]12CC[C@@H](C([C@@H]1CC[C@@]3([C@@H]2CC=C4[C@]3(CC[C@@]5([C@H]4CC(CC5)(C)C)C(=O)O)C)C)(C)C)O	C1=C2C(CCC3CCCC[C@@H]23)C2CC[C@H]3CCCCC3[C@H]2C1	12.7532	-0.553469	12.7532	0.0301127	0.409055	456.711	408.327	456.36	186	0	0.309742	-0.480806	0.480806	0.309742	0.878788	1.54545	2.21212	1.59782	884.973	24.2423	22.2605	22.2605	15.1409	13.7614	13.7614	15.0525	15.0525	13.0421	13.0421	10.6158	10.6158	-0.83	1.36442e+07	23.8906	6.89007	2.86768	201.354	10.2131	0	0	0	0	5.96931	4.79454	0
10	Abietic acid	10569	CC(C)C1=CC2=CC[C@@H]3[C@@]([C@H]2CC1)(CCC[C@@]3(C)C(=O)O)C	C1=CC2=CC[C@H]3CCCCC3[C@H]2CC1	11.942	-0.58843	11.942	0.161193	0.760294	302.458	272.218	302.225	122	0	0.309162	-0.480821	0.480821	0.309162	1.31818	2.04545	2.68182	1.99875	541.91	16.121	14.4849	14.4849	10.2874	8.92724	8.92724	8.53962	8.53962	7.06827	7.06827	5.60058	5.60058	-1.05	80295.8	15.8309	5.24726	2.17774	134.232	5.10653	0	0	0	0	5.96931	4.79454	0
11	Glycyrrhizic acid	14982	C[C@]12CC[C@](C[C@H]1C3=CC(=O)[C@@H]4[C@]5(CC[C@@H](C([C@@H]5CC[C@]4([C@@]3(CC2)C)C)(C)C)O[C@@H]6[C@@H]([C@H]([C@@H]([C@H](O6)C(=O)O)O)O)O[C@H]7[C@@H]([C@H]([C@@H]([C@H](O7)C(=O)O)O)O)O)C)(C)C(=O)O	O=C1C=C2C(CCC3CCCC[C@@H]23)C2CC[C@H]3C[C@@H](O[C@H]4OCCC[C@H]4O[C@H]4CCCCO4)CCC3[C@@H]12	14.8385	-2.04786	14.8385	0.0217094	0.17121	822.942	760.446	822.404	326	0	0.335291	-0.480829	0.480829	0.335291	0.689655	1.27586	1.87931	1.17385	1731.14	42.8692	34.3679	34.3679	26.7697	20.7443	20.7443	20.6233	20.6233	17.2214	17.2214	13.3692	13.3692	-2.54	1.7475e+12	43.5462	14.2638	6.24734	337.426	59.7997	36.6238	30.5712	0	0	17.9079	9.58907	9.58907
12	Camptothecin	24360	CC[C@@]1(C2=C(COC1=O)C(=O)N3CC4=CC5=CC=CC=C5N=C4C3=C2)O	O=C1Cc2cc3n(c(=O)c2CO1)Cc1cc2ccccc2nc1-3	13.0105	-1.78975	13.0105	0.109782	0.532764	348.358	332.23	348.111	130	0	0.342676	-0.458198	0.458198	0.342676	1.26923	2.07692	2.88462	1.81341	1164.42	18.0517	14.1518	14.1518	12.525	8.58513	8.58513	6.79187	6.79187	5.41679	5.41679	3.92515	3.92515	-2.99	1.523e+06	15.2794	5.01614	1.81876	148.228	14.4105	6.60688	5.60105	0	5.55927	5.96931	4.79454	9.77852
13	Doxorubicin	31703	C[C@H]1[C@H]([C@H](C[C@@H](O1)O[C@H]2C[C@@](CC3=C2C(=C4C(=C3O)C(=O)C5=C(C4=O)C(=CC=C5)OC)O)(C(=O)CO)O)N)O	O=C1c2ccccc2C(=O)c2cc3c(cc21)CCC[C@@H]3O[C@H]1CCCCO1	13.6431	-2.24074	13.6431	0.0172524	0.235263	543.525	514.293	543.174	208	0	0.201631	-0.506848	0.506848	0.201631	1.15385	1.84615	2.48718	1.68626	1376.52	28.386	21.2101	21.2101	18.4278	12.4118	12.4118	10.1599	10.1599	7.80528	7.80528	5.75026	5.75026	-3.39	3.7487e+08	27.1873	9.66246	4.11177	222.081	45.4769	29.4565	17.8565	5.78324	0	0	14.3836	0
14	Paclitaxel	36314	CC1=C2[C@H](C(=O)[C@@]3([C@H](C[C@@H]4[C@]([C@H]3[C@@H]([C@@](C2(C)C)(C[C@@H]1OC(=O)[C@@H]([C@H](C5=CC=CC=C5)NC(=O)C6=CC=CC=C6)O)O)OC(=O)C7=CC=CC=C7)(CO4)OC(=O)C)O)C)OC(=O)C	O=C(C[C@@H](NC(=O)c1ccccc1)c1ccccc1)O[C@@H]1C=C2CC(C1)[C@@H](OC(=O)c1ccccc1)[C@H]1C(CC[C@H]3OCC31)C(=O)C2	15.4838	-2.39096	15.4838	0.00288534	0.129786	853.918	802.51	853.331	328	0	0.338014	-0.455737	0.455737	0.338014	0.822581	1.40323	1.95161	1.38745	2280.35	44.9402	35.2327	35.2327	29.2723	20.4728	20.4728	17.354	17.354	13.4799	13.4799	10.1825	10.1825	-5.74	1.95363e+13	44.3204	16.5128	7.29441	357.885	44.3207	23.9129	23.5922	0	5.90718	23.8772	19.1781	9.58907
15	Lupeol	259846	CC(=C)[C@@H]1CC[C@]2([C@H]1[C@H]3CC[C@@H]4[C@]5(CC[C@@H](C([C@@H]5CC[C@]4([C@@]3(CC2)C)C)(C)C)O)C)C	C1CC[C@@H]2CCC3C4CCC5CCC[C@@H]5[C@H]4CC[C@@H]3C2C1	10.8927	-0.118464	10.8927	0.0632151	0.420722	426.729	376.329	426.386	176	0	0.0593749	-0.392562	0.392562	0.0593749	0.741935	1.45161	2.12903	1.54376	766.373	22.6125	21.6895	21.6895	14.3118	13.6468	13.6468	14.7156	14.7156	13.4629	13.4629	11.4811	11.4811	-0.3	7.31381e+06	22.4901	6.63961	2.6519	192.398	5.10653	0	0	0	0	0	0	0
16	Irinotecan	60838	CCC1=C2CN3C(=CC4=C(C3=O)COC(=O)[C@@]4(CC)O)C2=NC5=C1C=C(C=C5)OC(=O)N6CCC(CC6)N7CCCCC7	O=C1Cc2cc3n(c(=O)c2CO1)Cc1cc2cc(OC(=O)N4CCC(N5CCCCC5)CC4)ccc2nc1-3	13.5812	-1.86397	13.5812	0.095133	0.355956	586.689	548.385	586.279	226	0	0.414728	-0.458198	0.458198	0.414728	1.06977	1.83721	2.55814	1.16328	1685.12	29.8797	24.8564	24.8564	20.817	15.6547	15.6547	12.2359	12.2359	9.96562	9.96562	7.47064	7.47064	-3.76	8.81376e+09	28.0362	10.749	4.53453	249.756	28.9472	12.3564	5.60105	0	5.55927	12.0625	4.79454	14.5731
17	Ursolic acid	64945	C[C@@H]1CC[C@@]2(CC[C@@]3(C(=CC[C@H]4[C@]3(CC[C@@H]5[C@@]4(CC[C@@H](C5(C)C)O)C)C)[C@@H]2[C@H]1C)C)C(=O)O	C1=C2C(CCC3CCCC[C@@H]23)C2CC[C@H]3CCCCC3[C@H]2C1	12.7944	-0.557034	12.7944	0.03019	0.414109	456.711	408.327	456.36	186	0	0.309753	-0.480805	0.480805	0.309753	0.909091	1.60606	2.27273	1.6127	873.767	24.1899	22.2081	22.2081	15.2552	13.8757	13.8757	14.4843	14.4843	13.3946	13.3946	10.8474	10.8474	-0.83	1.60356e+07	23.8906	7.10994	2.75202	201.354	10.2131	0	0	0	0	5.96931	4.79454	0
18	Betulinic acid	64971	CC(=C)[C@@H]1CC[C@]2([C@H]1[C@H]3CC[C@@H]4[C@]5(CC[C@@H](C([C@@H]5CC[C@]4([C@@]3(CC2)C)C)(C)C)O)C)C(=O)O	C1CC2[C@@H](CCC3C4CCC5CCC[C@@H]5[C@H]4CC[C@@H]32)CC1	12.7551	-0.537718	12.7551	0.0202284	0.436098	456.711	408.327	456.36	186	0	0.309446	-0.480814	0.480814	0.309446	0.818182	1.51515	2.15152	1.56519	860.603	24.1899	22.045	22.045	15.2552	13.8246	13.8246	14.5229	14.5229	13.4722	13.4722	11.5017	11.5017	-0.83	1.88906e+07	23.8906	7.10994	2.75202	201.354	10.2131	0	0	0	0	5.96931	4.79454	0
19	Baicalin	64982	C1=CC=C(C=C1)C2=CC(=O)C3=C(C(=C(C=C3O2)O[C@H]4[C@@H]([C@H]([C@@H]([C@H](O4)C(=O)O)O)O)O)O)O	O=c1cc(-c2ccccc2)oc2cc(O[C@H]3CCCCO3)ccc12	12.5336	-1.93759	12.5336	0.164423	0.299297	446.364	428.22	446.085	168	0	0.335335	-0.503556	0.503556	0.335335	0.9375	1.625	2.28125	1.76543	1219.88	23.154	16.1527	16.1527	15.1844	9.36054	9.36054	7.13892	7.13892	5.046	5.046	3.37819	3.37819	-3.64	1.34431e+07	21.5867	8.12895	3.62777	178.474	44.53	35.0414	23.0318	12.0395	0	5.96931	4.79454	4.79454
20	Honokiol	72303	C=CCC1=CC(=C(C=C1)O)C2=CC(=C(C=C2)O)CC=C	c1ccc(-c2ccccc2)cc1	10.0382	0.229681	10.0382	0.229681	0.795312	266.34	248.196	266.131	102	0	0.122919	-0.507663	0.507663	0.122919	0.85	1.55	2.25	2.49312	641.862	14.5352	11.3417	11.3417	9.6514	6.51338	6.51338	4.68059	4.68059	3.19576	3.19576	2.18009	2.18009	-2.48	34486.4	13.9403	6.10987	2.91217	118.887	10.2131	11.499	0	0	0	0	0	0
21	Betulin	72326	CC(=C)[C@@H]1CC[C@]2([C@H]1[C@H]3CC[C@@H]4[C@]5(CC[C@@H](C([C@@H]5CC[C@]4([C@@]3(CC2)C)C)(C)C)O)C)CO	C1CC2[C@@H](CCC3C4CCC5CCC[C@@H]5[C@H]4CC[C@@H]32)CC1	10.8962	-0.146739	10.8962	0.0289589	0.452089	442.728	392.328	442.381	182	0	0.0593749	-0.395787	0.395787	0.0593749	0.8125	1.53125	2.1875	1.54885	785.701	23.3196	21.8438	21.8438	14.8724	13.8166	13.8166	14.5821	14.5821	13.5338	13.5338	11.5479	11.5479	-0.34	1.3175e+07	23.4041	7.09426	2.66234	197.192	10.2131	0	0	0	0	0	0	0
22	Sennoside A	73111	C1=CC2=C(C(=C1)O[C@H]3[C@@H]([C@H]([C@@H]([C@H](O3)CO)O)O)O)C(=O)C4=C([C@@H]2[C@@H]5C6=C(C(=CC=C6)O[C@H]7[C@@H]([C@H]([C@@H]([C@H](O7)CO)O)O)O)C(=O)C8=C5C=C(C=C8O)C(=O)O)C=C(C=C4O)C(=O)O	O=C1c2ccccc2[C@H]([C@H]2c3ccccc3C(=O)c3c(O[C@H]4CCCCO4)cccc32)c2cccc(O[C@H]3CCCCO3)c21	14.6616	-1.94481	14.6616	0.00301042	0.0950377	862.746	824.442	862.196	326	0	0.335329	-0.507146	0.507146	0.335329	0.516129	0.887097	1.22581	1.37824	2327.14	44.6342	31.7485	31.7485	29.4786	18.9837	18.9837	15.2141	15.2141	11.6719	11.6719	8.70974	8.70974	-6.04	3.63288e+13	42.6424	16.0154	6.73003	347.779	80.2258	71.8298	0	24.1465	0	11.9386	9.58907	9.58907
23	Echinocystic acid	73309	C[C@]12CC[C@@H](C([C@@H]1CC[C@@]3([C@@H]2CC=C4[C@]3(C[C@H]([C@@]5([C@H]4CC(CC5)(C)C)C(=O)O)O)C)C)(C)C)O	C1=C2C(CCC3CCCC[C@@H]23)C2CC[C@H]3CCCCC3[C@H]2C1	12.8036	-1.03958	12.8036	0.0217649	0.396846	472.71	424.326	472.355	192	0	0.312393	-0.480734	0.480734	0.312393	0.852941	1.52941	2.17647	1.62863	918.766	25.1125	22.578	22.578	15.5616	13.863	13.863	15.1566	15.1566	13.0618	13.0618	10.7183	10.7183	-0.87	1.97899e+07	24.8081	7.11987	2.8187	206.148	15.3196	5.41499	0	0	0	5.96931	4.79454	0
24	Arjunolic acid	73641	C[C@@]12CC[C@@H]3[C@@]([C@H]1CC=C4[C@]2(CC[C@@]5([C@H]4CC(CC5)(C)C)C(=O)O)C)(C[C@H]([C@@H]([C@@]3(C)CO)O)O)C	C1=C2C(CCC3CCCC[C@@H]23)C2CC[C@H]3CCCCC3[C@H]2C1	12.7709	-0.906903	12.7709	0.0069794	0.401778	488.709	440.325	488.35	198	0	0.309742	-0.480806	0.480806	0.309742	0.942857	1.6	2.22857	1.60823	941.031	25.8196	22.7323	22.7323	16.1122	14.0228	14.0228	15.0569	15.0569	13.1546	13.1546	10.7727	10.7727	-0.91	3.5332e+07	25.7276	7.57043	3.06882	210.942	20.4261	0	0	0	0	5.96931	4.79454	0
25	Maslinic acid	73659	C[C@@]12CC[C@@H]3[C@@]([C@H]1CC=C4[C@]2(CC[C@@]5([C@H]4CC(CC5)(C)C)C(=O)O)C)(C[C@H]([C@@H](C3(C)C)O)O)C	C1=C2C(CCC3CCCC[C@@H]23)C2CC[C@H]3CCCCC3[C@H]2C1	12.7616	-0.678757	12.7616	0.00784545	0.396846	472.71	424.326	472.355	192	0	0.309742	-0.480806	0.480806	0.309742	0.882353	1.52941	2.17647	1.60731	918.766	25.1125	22.578	22.578	15.5516	13.853	13.853	15.2143	15.2143	13.0026	13.0026	10.7641	10.7641	-0.87	1.981e+07	24.8081	7.11987	2.87586	206.148	15.3196	0	0	0	0	5.96931	4.79454	0
26	Dehydroabietic acid	94391	CC(C)C1=CC2=C(C=C1)[C@]3(CCC[C@@]([C@@H]3CC2)(C)C(=O)O)C	c1ccc2c(c1)CC[C@H]1CCCCC21	11.9286	-0.605856	11.9286	0.0223044	0.842704	300.442	272.218	300.209	120	0	0.309162	-0.480821	0.480821	0.309162	1.27273	2	2.63636	2.07611	603.725	16.121	14.2777	14.2777	10.2874	8.6554	8.6554	8.15619	8.15619	6.53259	6.53259	5.12651	5.12651	-1.31	80295.8	15.5806	5.10939	2.10673	133.485	5.10653	0	0	0	0	5.96931	4.79454	0
27	10-Hydroxycamptothecin	97226	CC[C@@]1(C2=C(COC1=O)C(=O)N3CC4=C(C3=C2)N=C5C=CC(=CC5=C4)O)O	O=C1Cc2cc3n(c(=O)c2CO1)Cc1cc2ccccc2nc1-3	13.0246	-1.82567	13.0246	0.110129	0.499433	364.357	348.229	364.106	136	0	0.342676	-0.507942	0.507942	0.342676	1.25926	2.07407	2.85185	1.79553	1213.2	18.9219	14.5217	14.5217	12.9189	8.71942	8.71942	6.97617	6.97617	5.49115	5.49115	3.97309	3.97309	-3.19	2.14342e+06	16.018	5.1703	2.02691	153.022	19.517	12.3564	5.60105	0	5.55927	5.96931	4.79454	9.77852
28	Diosgenin	99474	C[C@@H]1CC[C@@]2([C@H]([C@H]3[C@@H](O2)C[C@@H]4[C@@]3(CC[C@H]5[C@H]4CC=C6[C@@]5(CC[C@@H](C6)O)C)C)C)OC1	C1=C2CCCCC2[C@H]2CCC3[C@@H](C[C@@H]4O[C@]5(CCCCO5)C[C@H]34)[C@@H]2C1	10.256	-0.293853	10.256	0.107204	0.515749	414.63	372.294	414.313	168	0	0.171067	-0.392797	0.392797	0.171067	1.03333	1.86667	2.63333	1.2822	736.39	20.8885	19.5309	19.5309	14.2673	12.9607	12.9607	12.6736	12.6736	11.3449	11.3449	9.65901	9.65901	-0.38	1.0052e+07	20.2428	6.57613	2.54937	182.524	14.5803	0	5.78711	0	0	0	0	0
29	Erythrodiol	101761	C[C@]12CC[C@@H](C([C@@H]1CC[C@@]3([C@@H]2CC=C4[C@]3(CC[C@@]5([C@H]4CC(CC5)(C)C)CO)C)C)(C)C)O	C1=C2C(CCC3CCCC[C@@H]23)C2CC[C@H]3CCCCC3[C@H]2C1	10.8871	-0.15321	10.8871	0.0190747	0.423598	442.728	392.328	442.381	182	0	0.0593749	-0.395775	0.395775	0.0593749	0.84375	1.53125	2.21875	1.57982	809.649	23.372	22.0594	22.0594	14.7582	13.7535	13.7535	15.1117	15.1117	13.1068	13.1068	10.6263	10.6263	-0.34	9.60086e+06	23.4041	6.86964	2.77725	197.192	10.2131	0	0	0	0	0	0	0
30	Gastrodin	115067	C1=CC(=CC=C1CO)O[C@H]2[C@@H]([C@H]([C@@H]([C@H](O2)CO)O)O)O	c1ccc(O[C@H]2CCCCO2)cc1	9.80162	-1.4698	9.80162	0.0968983	0.449993	286.28	268.136	286.105	112	0	0.228721	-0.461987	0.461987	0.228721	0.95	1.6	2.15	2.06336	419.233	14.6983	10.6629	10.6629	9.56208	6.23479	6.23479	4.61719	4.61719	3.20661	3.20661	1.97228	1.97228	-1.22	33496.3	15.1742	6.48711	3.08875	115.178	35.0064	30.1654	0	6.29003	0	0	0	0
31	Celastrol	122724	CC1=C(C(=O)C=C2C1=CC=C3[C@]2(CC[C@@]4([C@@]3(CC[C@@]5([C@H]4C[C@](CC5)(C)C(=O)O)C)C)C)C)O	O=C1C=CC2=CC=C3C4CCC5CCCC[C@H]5C4CCC3C2=C1	12.5805	-0.654806	12.5805	7.46016e-05	0.466149	450.619	412.315	450.277	178	0	0.308856	-0.503924	0.503924	0.308856	0.969697	1.63636	2.30303	1.64415	1104.66	24.1899	20.9701	20.9701	15.2183	12.554	12.554	12.9148	12.9148	11.3884	11.3884	8.65097	8.65097	-2.1	1.5827e+07	22.6804	6.51757	2.63966	197.082	10.2131	0	5.75916	5.78324	0	5.96931	9.58907	0
32	Tanshinone IIA	164676	CC1=COC2=C1C(=O)C(=O)C3=C2C=CC4=C3CCCC4(C)C	O=C1C(=O)c2c(ccc3c2CCCC3)-c2occc21	12.7212	-0.425436	12.7212	0.0469234	0.682421	294.35	276.206	294.126	112	0	0.237213	-0.463249	0.463249	0.237213	1.09091	1.81818	2.59091	2.07125	836.605	15.6459	13.0781	13.0781	10.4155	7.75454	7.75454	7.03276	7.03276	5.15051	5.15051	3.98355	3.98355	-2.16	140496	13.4993	4.18763	1.56592	128.879	4.41715	5.76025	0	11.5665	0	0	9.58907	0
33	Saikosaponin A	167928	C[C@@H]1[C@@H]([C@@H]([C@H]([C@@H](O1)O[C@H]2CC[C@]3([C@H]([C@]2(C)CO)CC[C@@]4([C@@H]3C=C[C@@]56[C@]4(C[C@@H]([C@@]7([C@H]5CC(CC7)(C)C)CO6)O)C)C)C)O)O[C@H]8[C@@H]([C@H]([C@@H]([C@H](O8)CO)O)O)O)O	C1=C[C@]23OC[C@@]4(CCCC[C@H]42)CCC3C2CC[C@H]3C[C@@H](O[C@H]4C[C@@H](O[C@H]5CCCCO5)CCO4)CCC3[C@@H]12	12.1295	-1.72172	12.1295	0.0414355	0.143152	780.993	712.449	780.466	314	0	0.186735	-0.395695	0.395695	0.186735	0.727273	1.43636	2.12727	1.04963	1492.45	39.8882	33.7121	33.7121	25.6827	20.9385	20.9385	20.9553	20.9553	17.9224	17.9224	14.3006	14.3006	-0.78	9.02261e+11	40.9753	13.3612	5.43902	324.887	64.5365	42.7278	12.5801	0	0	0	0	0
34	Pomolic acid	382831	C[C@@H]1CC[C@@]2(CC[C@@]3(C(=CC[C@H]4[C@]3(CC[C@@H]5[C@@]4(CC[C@@H](C5(C)C)O)C)C)[C@@H]2[C@]1(C)O)C)C(=O)O	C1=C2C(CCC3CCCC[C@@H]23)C2CC[C@H]3CCCCC3[C@H]2C1	12.8255	-1.00854	12.8255	0.0715618	0.396846	472.71	424.326	472.355	192	0	0.309856	-0.480804	0.480804	0.309856	0.911765	1.58824	2.23529	1.63941	918.766	25.1125	22.578	22.578	15.5885	13.9326	13.9326	14.7301	14.7301	13.4643	13.4643	10.8437	10.8437	-0.87	2.14183e+07	24.8081	7.11987	2.70938	206.148	15.3196	0	0	0	0	5.96931	4.79454	0
35	Ginsenoside Rg1	441923	CC(=CCC[C@@](C)([C@H]1CC[C@@]2([C@@H]1[C@@H](C[C@H]3[C@]2(C[C@@H]([C@@H]4[C@@]3(CC[C@@H](C4(C)C)O)C)O[C@H]5[C@@H]([C@H]([C@@H]([C@H](O5)CO)O)O)O)C)O)C)O[C@H]6[C@@H]([C@H]([C@@H]([C@H](O6)CO)O)O)O)C	C1CC2[C@H](CC1)[C@@H](O[C@H]1CCCCO1)CC1C3CC[C@H](CO[C@H]4CCCCO4)[C@H]3CC[C@@H]12	12.5558	-1.60723	12.5558	0.000257959	0.110176	801.024	728.448	800.492	324	0	0.186788	-0.393567	0.393567	0.186788	0.75	1.32143	1.89286	1.38952	1404.85	41.4989	34.5685	34.5685	26.0166	20.9584	20.9584	20.2447	20.2447	16.5986	16.5986	13.4593	13.4593	-0.82	7.79392e+11	44.7255	15.8961	7.06304	331.374	70.0127	48.8317	12.5801	0	0	0	0	0
36	Cinnamic acid	444539	C1=CC=C(C=C1)/C=C/C(=O)O	c1ccccc1	10.0858	-0.922358	10.0858	0.898056	0.64892	148.161	140.097	148.052	56	0	0.327821	-0.478074	0.478074	0.327821	1.27273	1.90909	2.45455	2.72177	262.151	8.10445	5.89691	5.89691	5.28769	3.2491	3.2491	2.08225	2.08225	1.21793	1.21793	0.731664	0.731664	-1.57	349.029	7.53604	3.56215	2.66782	64.7924	5.10653	0	0	0	0	5.96931	0	4.79454
37	Ergosterol	444679	C[C@H](/C=C/[C@H](C)C(C)C)[C@H]1CC[C@@H]2[C@@]1(CC[C@H]3C2=CC=C4[C@@]3(CC[C@@H](C4)O)C)C	C1=C2CCCCC2[C@H]2CCC3CCC[C@H]3C2=C1	10.2013	-0.11587	10.2013	0.11587	0.493108	396.659	352.307	396.339	162	0	0.0577519	-0.392796	0.392796	0.0577519	0.931034	1.68966	2.41379	1.56738	711.825	20.9743	19.7478	19.7478	13.6644	12.4402	12.4402	11.8533	11.8533	10.0224	10.0224	7.59438	7.59438	-0.82	3.3335e+06	21.4135	7.70214	3.49892	179.295	5.10653	0	0	0	0	0	0	0
38	Resveratrol	445154	C1=CC(=CC=C1/C=C/C2=CC(=CC(=C2)O)O)O	C(=C/c1ccccc1)\c1ccccc1	9.30053	0.0234779	9.30053	0.0234779	0.692341	228.247	216.151	228.079	86	0	0.119362	-0.507966	0.507966	0.119362	0.588235	1.11765	1.70588	2.22251	521.644	12.2507	9.03779	9.03779	8.13103	5.13492	5.13492	3.70761	3.70761	2.28619	2.28619	1.49215	1.49215	-2.42	7380.19	11.077	4.61486	3.01407	98.9115	15.3196	17.2485	0	0	0	0	0	0
39	Curcumin	969516	COC1=C(C=CC(=C1)/C=C/C(=O)CC(=O)/C=C/C2=CC(=C(C=C2)O)OC)O	O=C(/C=C/c1ccccc1)CC(=O)/C=C/c1ccccc1	11.9294	-0.347242	11.9294	0.00662287	0.548123	368.385	348.225	368.126	140	0	0.162919	-0.504254	0.504254	0.162919	0.814815	1.22222	1.59259	1.95886	822.04	19.8112	15.008	15.008	12.9223	8.08475	8.08475	5.63864	5.63864	3.67937	3.67937	2.26368	2.26368	-3.54	881034	19.7804	9.23884	5.7434	156.532	19.6868	0	34.5645	0	0	0	9.58907	0
40	Dihydroartemisinin	3000518	C[C@@H]1CC[C@H]2[C@H]([C@H](O[C@H]3[C@@]24[C@H]1CC[C@](O3)(OO4)C)O)C	C1C[C@@H]2CCC3OO[C@@]24[C@@H](C1)CCO[C@@H]4O3	10.1964	-0.781267	10.1964	0.037876	0.690996	284.352	260.16	284.162	114	0	0.201282	-0.367604	0.367604	0.201282	1.05	1.85	2.65	1.81728	411.068	14.121	12.3727	12.3727	9.46178	7.84337	7.84337	7.29587	7.29587	6.12292	6.12292	4.88541	4.88541	-0.2	48486.5	13.462	4.16883	1.55719	119.003	14.5803	0	18.1811	5.78711	0	0	0	9.77514
41	Dasatinib	3062316	CC1=C(C(=CC=C1)Cl)NC(=O)C2=CN=C(S2)NC3=CC(=NC(=N3)C)N4CCN(CC4)CCO	O=C(Nc1ccccc1)c1cnc(Nc2cc(N3CCNCC3)ncn2)s1	12.6931	-0.266614	12.6931	0.173118	0.465717	488.017	461.809	487.156	174	0	0.267	-0.395045	0.395045	0.267	1.21212	2	2.72727	1.43159	1111.43	23.3717	18.5071	20.0796	15.9231	10.6586	11.8531	7.75142	9.18926	5.3619	6.58841	3.63178	4.61926	-2.79	3.38766e+07	23.3709	10.4296	5.77223	201.002	20.64	22.3373	5.13156	0	5.90718	0	9.69445	14.9519
42	Wogonoside	3084961	COC1=C(C=C(C2=C1OC(=CC2=O)C3=CC=CC=C3)O)O[C@H]4[C@@H]([C@H]([C@@H]([C@H](O4)C(=O)O)O)O)O	O=c1cc(-c2ccccc2)oc2cc(O[C@H]3CCCCO3)ccc12	12.7051	-1.90676	12.7051	0.151882	0.357108	460.391	440.231	460.101	174	0	0.335335	-0.506888	0.506888	0.335335	1.0303	1.72727	2.36364	1.81247	1236.56	23.8611	17.1138	17.1138	15.7225	9.7493	9.7493	7.32507	7.32507	5.22018	5.22018	3.56981	3.56981	-3.64	2.23525e+07	22.5503	8.71341	3.98057	185.159	44.1604	35.2079	22.8653	12.0395	0	5.96931	4.79454	4.79454
43	Sodium glycyrrhetinate	3676412	C[C@]12CC[C@](C)(C([O-])=O)C[C@H]1C3=CC([C@@H]4[C@@]5(C)CC[C@H](O)C(C)(C)[C@@H]5CC[C@@]4(C)[C@]3(C)CC2)=O	O=C1C=C2C(CCC3CCCC[C@@H]23)C2CC[C@H]3CCCCC3[C@@H]12	14.19	-0.940125	14.19	0.0419021	0.581016	469.686	424.326	469.332	190	0	0.159379	-0.549568	0.549568	0.159379	0.941176	1.58824	2.23529	1.62202	964.852	25.1125	22.4227	22.4227	15.5516	13.7069	13.7069	14.9164	14.9164	13.0464	13.0464	10.3538	10.3538	-1.16	2.03456e+07	24.5307	6.9859	2.81091	205.515	15.0076	0	5.78324	0	0	0	4.79454	0
44	Stigmasterol	5280794	CC[C@H](/C=C/[C@@H](C)[C@H]1CC[C@@H]2[C@@]1(CC[C@H]3[C@H]2CC=C4[C@@]3(CC[C@@H](C4)O)C)C)C(C)C	C1=C2CCCCC2[C@H]2CCC3CCC[C@H]3[C@@H]2C1	10.2399	-0.0870232	10.2399	0.0870232	0.4566	412.702	364.318	412.371	170	0	0.0577401	-0.392797	0.392797	0.0577401	1.03333	1.8	2.5	1.52012	673.851	21.6814	20.662	20.662	14.2024	13.262	13.262	12.4445	12.4445	10.7755	10.7755	8.82777	8.82777	-0.56	5.5681e+06	22.6274	8.41681	3.65553	186.349	5.10653	0	0	0	0	0	0	0
45	Baicalein	5281605	C1=CC=C(C=C1)C2=CC(=O)C3=C(O2)C=C(C(=C3O)O)O	O=c1cc(-c2ccccc2)oc2ccccc12	12.0445	-0.738647	12.0445	0.00384543	0.591055	270.24	260.16	270.053	100	0	0.20085	-0.504068	0.504068	0.20085	0.9	1.6	2.3	2.36233	849.507	14.2757	10.1996	10.1996	9.57539	5.84858	5.84858	4.30697	4.30697	3.00475	3.00475	2.02356	2.02356	-2.95	42910.9	12.1028	4.3078	1.76304	112.519	19.7367	16.7295	16.9278	5.74951	0	0	4.79454	0
46	Puerarin	5281807	C1=CC(=CC=C1C2=COC3=C(C2=O)C=CC(=C3[C@H]4[C@@H]([C@H]([C@@H]([C@H](O4)CO)O)O)O)O)O	O=c1c(-c2ccccc2)coc2c([C@H]3CCCCO3)cccc12	13.0417	-1.65412	13.0417	0.0405121	0.354663	416.382	396.222	416.111	158	0	0.200006	-0.507966	0.507966	0.200006	0.9	1.6	2.26667	1.86866	1119.77	21.5766	15.5433	15.5433	14.3286	9.20438	9.20438	7.14991	7.14991	5.31205	5.31205	3.66662	3.66662	-2.95	5.90261e+06	20.328	7.70839	3.22285	169.199	39.7932	53.865	0	5.42879	0	0	4.79454	0
47	Icariin	5318997	C[C@H]1[C@@H]([C@H]([C@H]([C@@H](O1)OC2=C(OC3=C(C2=O)C(=CC(=C3CC=C(C)C)O[C@H]4[C@@H]([C@H]([C@@H]([C@H](O4)CO)O)O)O)O)C5=CC=C(C=C5)OC)O)O)O	O=c1c(O[C@H]2CCCCO2)c(-c2ccccc2)oc2cc(O[C@H]3CCCCO3)ccc12	14.2506	-1.77208	14.2506	0.0725309	0.139992	676.668	636.348	676.237	262	0	0.238644	-0.50689	0.50689	0.238644	0.875	1.5	2.10417	1.71302	1679.28	35.0239	26.5873	26.5873	22.7634	15.2377	15.2377	11.9944	11.9944	8.36679	8.36679	5.52052	5.52052	-3.77	2.66251e+10	35.5347	14.3764	6.73652	273.926	68.9537	70.9455	5.76025	23.7584	0	0	4.79454	0
48	Rhamnolipid	5458394	CCCCCCCC(CC(=O)O)OC(=O)CC(CCCCCCC)O[C@H]1[C@@H]([C@@H]([C@H]([C@@H](O1)C)O)O)O[C@H]2[C@@H]([C@@H]([C@H]([C@@H](O2)C)O)O)O	C1CC[C@@H](O[C@H]2CCCCO2)CO1	13.1214	-1.6685	13.1214	0.204528	0.078246	650.803	592.339	650.388	264	0	0.308213	-0.481128	0.481128	0.308213	0.644444	1.15556	1.71111	2.16443	843.884	33.5179	27.3687	27.3687	21.3864	16.824	16.824	12.5506	12.5506	8.56475	8.56475	5.71368	5.71368	-1.42	2.99557e+09	39.7574	20.7383	13.3105	266.697	54.3235	42.7278	12.5801	0	0	11.9386	9.58907	0
49	Poricoic acid A	5471851	CC(C)C(=C)CC[C@H]([C@H]1[C@@H](C[C@@]2([C@@]1(CC=C3C2=CC[C@H]([C@]3(C)CCC(=O)O)C(=C)C)C)C)O)C(=O)O	C1=C2CCCC=C2C2CCCC2C1	12.5522	-0.845255	12.5522	0.0882522	0.288063	498.704	452.336	498.335	200	0	0.306406	-0.48123	0.48123	0.306406	1.08333	1.72222	2.25	2.05103	1002.44	27.2148	23.0636	23.0636	16.5966	13.4719	13.4719	12.7288	12.7288	10.3818	10.3818	7.84954	7.84954	-2.14	3.71909e+07	28.4316	9.96328	4.52787	216.617	15.3196	0	0	0	0	11.9386	9.58907	0
50	Chlorin e6	5479494	CCC1=C(C2=CC3=C(C(=C(N3)C=C4[C@H]([C@@H](C(=N4)C(=C5C(=C(C(=N5)C=C1N2)C)C(=O)O)CC(=O)O)CCC(=O)O)C)C)C=C)C	C1=Cc2cc3ccc(cc4ccc(cc5nc(cc1n2)CC5)[nH]4)[nH]3	12.6752	-1.22821	12.6752	0.0450608	0.195382	596.684	560.396	596.263	228	0	0.33776	-0.48123	0.48123	0.33776	0.909091	1.59091	2.20455	2.03712	1944.39	32.0323	25.4604	25.4604	20.8527	14.6242	14.6242	11.487	11.487	8.94351	8.94351	6.52613	6.52613	-4.99	4.64422e+09	30.4672	11.5946	5.20634	253.782	25.2875	0	0	0	0	17.9079	14.5731	9.77852
51	Corosolic acid	6918774	C[C@@H]1CC[C@@]2(CC[C@@]3(C(=CC[C@H]4[C@]3(CC[C@@H]5[C@@]4(C[C@H]([C@@H](C5(C)C)O)O)C)C)[C@@H]2[C@H]1C)C)C(=O)O	C1=C2C(CCC3CCCC[C@@H]23)C2CC[C@H]3CCCCC3[C@H]2C1	12.8028	-0.67869	12.8028	0.00992878	0.405399	472.71	424.326	472.355	192	0	0.309753	-0.480805	0.480805	0.309753	0.941176	1.61765	2.26471	1.62165	907.481	25.0601	22.5255	22.5255	15.6658	13.9672	13.9672	14.6461	14.6461	13.3551	13.3551	10.9957	10.9957	-0.87	2.32777e+07	24.8081	7.34018	2.76323	206.148	15.3196	0	0	0	0	5.96931	4.79454	0
52	Cabazitaxel	9854073	CC1=C2[C@H](C(=O)[C@@]3([C@H](C[C@@H]4[C@]([C@H]3[C@@H]([C@@](C2(C)C)(C[C@@H]1OC(=O)[C@@H]([C@H](C5=CC=CC=C5)NC(=O)OC(C)(C)C)O)O)OC(=O)C6=CC=CC=C6)(CO4)OC(=O)C)OC)C)OC	O=C(CCc1ccccc1)O[C@@H]1C=C2CC(C1)[C@@H](OC(=O)c1ccccc1)[C@H]1C(CC[C@H]3OCC31)C(=O)C2	15.5406	-2.22013	15.5406	0.121226	0.170728	835.944	778.488	835.378	326	0	0.407747	-0.455738	0.455738	0.407747	0.933333	1.55	2.08333	1.51971	2011.57	44.1642	35.807	35.807	28.0664	20.1062	20.1062	17.9956	17.9956	13.0334	13.0334	10.0696	10.0696	-4.67	4.10525e+12	44.8718	16.3113	7.52287	349.559	48.6879	35.618	17.4883	0	0	24.0012	9.58907	14.3836
53	Sumaresinolic acid	9982268	C[C@]12CC[C@@H](C(C1[C@@H](C[C@@]3(C2CC=C4[C@]3(CC[C@@]5(C4CC(CC5)(C)C)C(=O)O)C)C)O)(C)C)O	C1=C2C3CCCCC3CCC2C2CCC3CCCCC3C2C1	12.7653	-0.624286	12.7653	0.034369	0.396846	472.71	424.326	472.355	192	0	0.309742	-0.480806	0.480806	0.309742	0.911765	1.55882	2.20588	1.626	918.766	25.1125	22.578	22.578	15.5516	13.853	13.853	15.2103	15.2103	12.9256	12.9256	10.8052	10.8052	-0.87	1.92586e+07	24.8081	7.11987	2.87586	206.148	15.3196	0	0	0	0	5.96931	4.79454	0
54	Ginsenoside Ro	11815492	C[C@]12CC[C@@H](C([C@@H]1CC[C@@]3([C@@H]2CC=C4[C@]3(CC[C@@]5([C@H]4CC(CC5)(C)C)C(=O)O[C@H]6[C@@H]([C@H]([C@@H]([C@H](O6)CO)O)O)O)C)C)(C)C)O[C@H]7[C@@H]([C@H]([C@@H]([C@H](O7)C(=O)O)O)O)O[C@H]8[C@@H]([C@H]([C@@H]([C@H](O8)CO)O)O)O	O=C(O[C@H]1CCCCO1)[C@]12CCCC[C@H]1C1=CC[C@H]3C(CC[C@H]4C[C@@H](O[C@@H]5OCCC[C@H]5O[C@H]5CCCCO5)CCC43)C1CC2	14.6811	-1.97755	14.6811	0.0827547	0.0837537	957.117	880.509	956.498	382	0	0.335291	-0.479243	0.479243	0.335291	0.641791	1.23881	1.85075	1.05008	1874.4	49.1367	39.7176	39.7176	31.2227	24.3074	24.3074	23.5013	23.5013	19.2813	19.2813	15.0087	15.0087	-1.92	174117378137550	51.4355	17.9816	8.05662	390.896	84.593	67.1436	18.684	6.29003	0	11.9386	4.79454	4.79454
55	15-Hydroxy-dehydroabietic acid	14487943	C[C@]12CCC[C@@]([C@@H]1CCC3=C2C=CC(=C3)C(C)(C)O)(C)C(=O)O	c1ccc2c(c1)CC[C@H]1CCCCC21	11.9377	-0.838366	11.9377	0.0723195	0.866507	316.441	288.217	316.204	126	0	0.309162	-0.480821	0.480821	0.309162	1.26087	1.95652	2.56522	2.08167	642.777	17.0436	14.6476	14.6476	10.588	8.68563	8.68563	8.51584	8.51584	6.54831	6.54831	5.12802	5.12802	-1.35	103573	16.5058	5.07176	2.4049	138.279	10.2131	0	0	0	0	5.96931	4.79454	0
56	Dehydrotumulosic acid	15225964	CC(C)C(=C)CC[C@H]([C@H]1[C@@H](C[C@@]2([C@@]1(CC=C3C2=CC[C@@H]4[C@@]3(CC[C@@H](C4(C)C)O)C)C)C)O)C(=O)O	C1=C2C(=CC[C@H]3CCCCC23)C2CCCC2C1	12.5649	-0.793032	12.5649	0.0013865	0.374272	484.721	436.337	484.355	196	0	0.306406	-0.481017	0.481017	0.306406	1.11429	1.77143	2.37143	1.72421	957.03	26.1375	23.0255	23.0255	16.1086	13.7922	13.7922	13.8645	13.8645	11.6227	11.6227	8.90353	8.90353	-1.39	3.02092e+07	26.6668	8.58415	3.72156	212.14	15.3196	0	0	0	0	5.96931	4.79454	0
57	Dehydrotrametenolic acid	15391340	CC(=CCC[C@H]([C@H]1CC[C@@]2([C@@]1(CC=C3C2=CC[C@@H]4[C@@]3(CC[C@@H](C4(C)C)O)C)C)C)C(=O)O)C	C1=C2C(=CC[C@H]3CCCCC23)C2CCCC2C1	12.4328	-0.615671	12.4328	0.0245449	0.427859	454.695	408.327	454.345	184	0	0.306304	-0.481018	0.481018	0.306304	1.09091	1.78788	2.42424	1.7	903.502	24.397	22.001	22.001	15.2872	13.2471	13.2471	13.2196	13.2196	11.1183	11.1183	8.7253	8.7253	-1.35	1.42087e+07	24.7644	8.10739	3.51096	200.98	10.2131	0	0	0	0	5.96931	4.79454	0
58	12-Hydroxyabietic acid	52325853	CC(C)C1=CC2=CC[C@@H]3[C@@]([C@H]2C[C@@H]1O)(CCC[C@@]3(C)C(=O)O)C	C1=CC2=CC[C@H]3CCCCC3[C@H]2CC1	11.957	-0.652737	11.957	0.01839	0.80288	318.457	288.217	318.219	128	0	0.309162	-0.480821	0.480821	0.309162	1.30435	2	2.6087	2.03236	573.436	16.9912	14.8023	14.8023	10.698	9.02881	9.02881	8.67753	8.67753	7.09668	7.09668	5.65632	5.65632	-1.09	115466	16.7568	5.47487	2.39198	139.026	10.2131	0	0	0	0	5.96931	4.79454	0
59	Liquidambaric acid	133053361	CC(=C)[C@@H]1CC[C@]2([C@H]1[C@H]3CC[C@@H]4[C@]5(CCC(=O)C([C@@H]5CC[C@]4([C@@]3(CC2)C)C)(C)C)C)C(=O)O	O=C1CCC2[C@@H](CCC3C4CCC5CCC[C@@H]5[C@H]4CC[C@@H]32)C1	12.9041	-0.547418	12.9041	0.163842	0.445426	454.695	408.327	454.345	184	0	0.309446	-0.480814	0.480814	0.309446	0.878788	1.57576	2.21212	1.57181	902.218	24.1899	21.9286	21.9286	15.2552	13.6771	13.6771	14.2919	14.2919	13.2394	13.2394	11.3125	11.3125	-1.12	1.88906e+07	23.6139	6.9729	2.68834	200.721	5.10653	5.78324	0	0	0	5.96931	9.58907	0
[truncated: 155 more columns]
